# Supplementary material for: Improving Tuber Yield of Tiger Nut (Cyperus esculentus L.) through Nitrogen Fertilization in Sandy Farmland
Source: MDPI journal article supplement (doi:10.3390/plants13081063), 2024-04-10
Supplement: s1 [file s1]

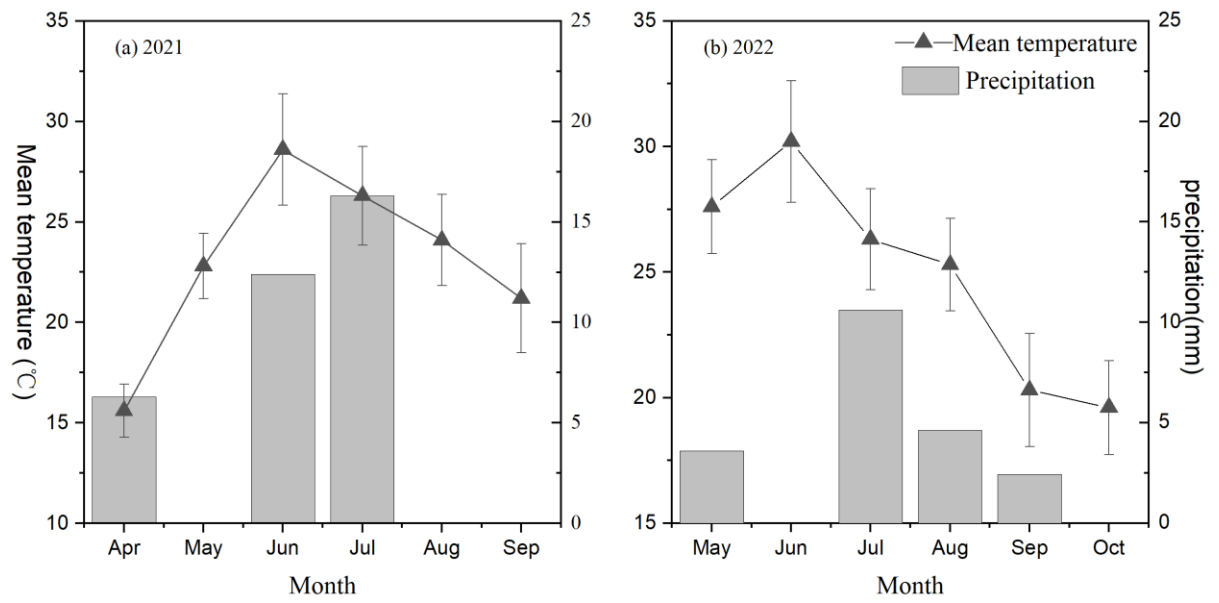

Figure S1 The monthly mean temperature (triangle) and precipitation (bar) of the study site in 2021 and 2022.

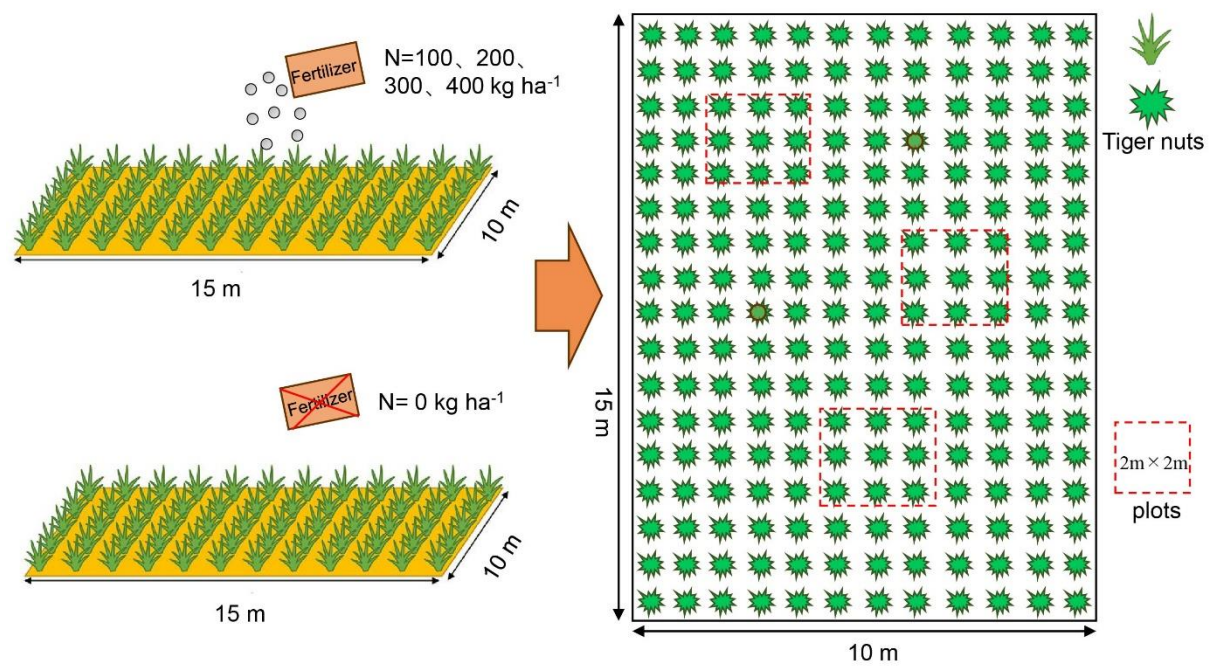

Figure S2 Different fertilization treatments and sampling methods in study area.
